1 **The rapid evolution of flagellar ion-selectivity in experimental populations of *E.***  
2 ***coli***

3 Pietro Ridone<sup>1</sup>, Tsubasa Ishida<sup>2,4</sup>, Angela Lin<sup>1</sup>, David T Humphreys<sup>3</sup>, Eleni  
4 Giannoulatou<sup>3</sup>, Yoshiyuki Sowa<sup>2,4</sup>, Matthew A. B. Baker<sup>1,5\*</sup>

5 <sup>1</sup>School of Biotechnology and Biomolecular Sciences, University of New South  
6 Wales, Sydney, Australia.

7 <sup>2</sup>Department of Frontier Bioscience, Hosei University, Tokyo, Japan.

8 <sup>3</sup>Victor Chang Cardiac Research Institute, Sydney, Australia

9 <sup>4</sup>Research Center for Micro-Nano Technology, Hosei University, Tokyo, Japan.

10 <sup>5</sup>ARC Centre of Excellence in Synthetic Biology, University of New South Wales,  
11 Sydney, Australia.

12 \*correspondence: [matthew.baker@unsw.edu.au](mailto:matthew.baker@unsw.edu.au)

13

14 **ABSTRACT**

15 Determining which cellular processes facilitate adaptation requires a tractable  
16 experimental model where an environmental cue can generate variants which rescue  
17 function. The Bacterial Flagellar Motor (BFM) is an excellent candidate – an ancient  
18 and highly conserved molecular complex for propulsion which navigates bacteria  
19 towards favourable environments. In most species, rotation is powered by H<sup>+</sup> or Na<sup>+</sup>  
20 ion transit through the torque-generating stator subunit of the motor complex. The  
21 ion that drives the rotor has changed over evolutionary timescales but the molecular  
22 basis of this selectivity remains unknown.

23 Here we used CRISPR engineering to replace the native *Escherichia coli* H<sup>+</sup>-  
24 powered stator with Na<sup>+</sup>-powered stator genes and report the rapid and spontaneous  
25 reversion of our edit in a low sodium environment. We followed the evolution of the  
26 stators during their reversion to H<sup>+</sup>-powered motility and used whole genome and  
27 transcriptome sequencing to identify both flagellar- and non-flagellar-associated  
28 genes involved in the cell's adaptation. Our transplant of an unfit protein and the  
29 cells' rapid response to this edit demonstrates the adaptability of the stator subunit  
30 and highlights the hierarchical modularity of the flagellar motor.

31

## 32 INTRODUCTION

33 Bacterial motility via the flagellar motor represents one of the earliest forms of  
34 locomotion (Miyata et al., 2020). This rotary motility imparts such significant selective  
35 advantage (1, 2) that resources are allocated to chemotaxis even in the absence of  
36 nutrient gradients (3, 4). The evolutionary origins and subsequent adaptation of the  
37 motor are of significant scientific and public interest (5), since the BFM holds  
38 prominence as an ancient and large molecular complex of high sophistication.  
39 Furthermore, the BFM is an ideal model for studies in molecular evolution since it  
40 demonstrates modularity (6, 7) and single nucleotide variants which result in  
41 changes in motility are easily experimentally selected (8).

42 The torque that drives the BFM is supplied by motor-associated transmembrane  
43 protein-complexes known as stators. The stator complex, an asymmetric  
44 heteroheptamer (in *E. coli*: MotA<sub>5</sub>MotA<sub>2</sub>) most likely acts itself as a miniature rotating  
45 nanomachine coupling ion transit to rotation (9, 10). The stators are essential for  
46 motility, as they drive rotation, and are accessible for studies in experimental  
47 evolution due to their unambiguous role in connecting a specific environmental cue  
48 (presence of the coupling ion) to an easily discernible phenotype (cell swimming).  
49 Furthermore, the stators have been subject to protein engineering approaches for  
50 many years, in particular the synthesis of chimeric stator constructs that enable the  
51 motor of *E. coli*, natively proton-driven, to be powered by sodium ion flow (11-14).  
52 The majority of stators are proton driven, but many that are sodium-driven can be  
53 found in nature (15), and this divergence is presumed to have occurred in the distant  
54 past (6, 16, 17). Past reports have argued that H<sup>+</sup>-coupled motility diverged from  
55 Na<sup>+</sup>-coupled machinery in ancestral times (18) but the molecular basis for this  
56 adaptation, and the evolutionary landscape that constrains stator adaptation remains  
57 unclear.

58 In order to simulate the effects of natural evolution on stator adaptation we designed  
59 an experiment where an *E. coli* strain, expressing only a sodium-powered stator,  
60 would be introduced to a non-lethal environment (soft agar swim plate) which lacked  
61 the power source for the stator (Na<sup>+</sup>). Our hypothesis was that the population would  
62 undergo selection for upmotile variants, adapting its stators to function in the new  
63 environment.

64 We used genomic editing techniques (no-SCAR CRISPR/Cas9 (19) and  $\lambda$ -Red (20))  
65 to replace the native *motA motB* stator genes of the *E. coli* BFM with chimeric  
66 sodium-powered *pomA potB* (henceforth Pots) stator genes derived from *Vibrio*  
67 *alginolyticus* (11). We transplanted the *pomA potB* stator genes at the same location  
68 and orientation of the native *motA motB* locus to preserve the native genomic context  
69 of the motile RP437 *E. coli* strain. We then examined which genetic changes  
70 occurred during growth on soft-agar in depleted sodium, that is, under selective  
71 pressure for proton-driven motility. We performed our directed evolution experiments  
72 of our Pots *E. coli* strain in the absence of antibiotics to avoid additional, undesired  
73 selective pressures (21).

## 74 RESULTS

75 *Directed evolution of Pots on low sodium swim plates.*

76 The RP437 strain was edited to carry the Pots stator genes in place of the native *E.*  
77 *coli motA motB* genes via the no-SCAR Method (19) and traditional  $\lambda$ -Red  
78 recombineering respectively (Supplementary Fig. 1 & 2). A single no-SCAR Pots  
79 clone was selected and tested on swim plates (Supplementary Fig. 3) after  
80 verification of successful editing by colony PCR and Sanger Sequencing  
81 (Supplementary Fig. 4). The edited strain was able to swim on sodium-rich ( $\text{Na}^+$ LB:  
82 ~100 mM NaCl) soft agar plates but not on potassium-rich sodium-poor swim plates  
83 ( $\text{K}^+$ LB: 67 mM KCl, ~15 mM  $[\text{Na}^+]$ ) (Supplementary Fig. 3A). This edited strain  
84 exhibited the same swimming behaviour as the control stator-less strain with motility  
85 restored via an inducible plasmid vector that could express the Pots construct  
86 (RP6894  $\Delta$ *motA motB* + pSHU1234, hereby pPots).

87 We next challenged this Potts strains to survive on K<sup>+</sup> based soft agar (K<sup>+</sup>LB) for  
88 prolonged periods (Supplementary Fig. 3B). Motile subpopulations arose  
89 spontaneously from inoculated colonies within a few days. Cells from the edge of  
90 these motile flares were passaged onto fresh swim agar for up to 5 passages at 3-4  
91 days intervals (Supplementary Fig. 5). When multiple flares occurred in a single  
92 swim ring, each was individually passaged (Supplementary Fig. 3B), and could be  
93 recapitulated (Fig. 1C, Supplementary Fig. 3C). Directed evolution consistently  
94 generated swimming flares when Potts clones were cultured on agar containing yeast  
95 extract and tryptone (K<sup>+</sup>LB swim plate: ~15 mM [Na<sup>+</sup>]), but not on minimal media  
96 (K<sup>+</sup>MM swim plate: ~1mM total [Na<sup>+</sup>]) or when the Potts construct was encoded on a  
97 plasmid (Supplementary Fig. 6). One Potts strain generated using λ-Red methods  
98 (20), which carried the native *V. alginolyticus* Shine–Dalgarno (SD) sequence, also  
99 successfully produced flares (Supplementary Fig. 7).

#### 100 *Whole genome sequencing of evolved lineages.*

101 Lineages were selected for whole-genome sequencing (WGS) after a preliminary  
102 screening for mutations in the stator genes by Sanger-sequencing PCR amplicons  
103 spanning the genomic *pomA**potB* locus (Fig. 1). Variant calling to the MG1655  
104 reference genome was used to compare single nucleotide polymorphisms (SNPs)  
105 between members of the same lineage. Our intended *pomA**potB* edit was the only  
106 difference between the RP437 and Potts genomes, indicating that neither no-SCAR  
107 nor λ-Red editing had resulted in off-target edits. 153 SNPs were called as variants  
108 between our experimental parent RP437 and the MG1655 reference which were  
109 shared across all lineage members (Supplementary Table 1).

110 Several lineages whose descendants could swim in reduced sodium had mutations  
111 at the *pomA**potB* locus (L3.3-4-5: *potB* G20V; L6.4-5: *pomA* L183F; L8.3-4-5: *potB*  
112 G20W). In contrast, lineages passaged only on ~100 mM Na<sup>+</sup> agar (L1 & L2)  
113 accumulated mutations not in stators but in the flagellar components. Lineages  
114 passaged on ~15 mM sodium-poor agar whose descendants could not swim (L4)  
115 had no mutations on any flagellar genes.

#### 116 *Differential expression across upmotile lineages G20V and L183F.*

117 To determine which genes may be involved in adaptation, we performed RNAseq  
118 experiments to measure transcript levels for two lineages which evolved different  
119 stator mutations over different lengths of time (Fig. 2, Supplementary Table 2).

120 These were: *pomA* L183F (Na<sup>+</sup> powered phenotype, 14 days) and *potB* G20V (H<sup>+</sup>  
121 phenotype, 7 days). From these, we selected the common ancestor to the two  
122 lineages (Pots), the last lineage member before the mutation occurred (L5.3 and  
123 L3.2, the pre-fixation sample) and the first available member carrying that lineage  
124 mutation on the chromosome (L6.4 and L3.3, the fixed variant). Of note, L5.3  
125 displayed improved swimming in K<sup>+</sup>LB despite being isogenic to its parent strain, the  
126 Pots common ancestor. Member L3.2 of the G20V lineage, the immediate  
127 predecessor to L3.3, in contrast, was non-motile. We closely examined the  
128 transcripts mapped to the *pomA/potB* locus in all samples and saw no enrichment of  
129 mutant transcripts above the background noise in the pre-fixation samples  
130 (Supplementary Fig. 8). This confirmed that a chromosomal mutation was  
131 responsible for the observed stator variants. To identify the common processes  
132 which could lead to variant fixation we calculated which differentially expressed  
133 genes were present in both lineages and performed pathway analysis to identify  
134 which biological processes were relevant to the shared genes (Fig. 2).

135 Both lineages increased expression of *IrhA* at the pre-fixation point, which acts as an  
136 inhibitor of the *flhDC* flagellar master regulator. Expression response was dominated  
137 by pathways under control of RpoD ( $\sigma$ 70) / FliA ( $\sigma$ 28) in L183F, and RpoD ( $\sigma$ 70) in  
138 *potB* G20V (Supplementary Fig. 9). The prominence of *FliA* regulation in *pomA*  
139 L183F was reflected by upregulation of motility genes at the fixation stage. Those  
140 same genes were not significantly affected in the G20V lineage, which instead  
141 promoted primarily adhesion/biofilm behavior in response to the changed  
142 environment.

#### 143 *Phenotypic characterization of evolved strains in the presence and absence of* 144 *sodium.*

145 We characterized rotational and free-swimming phenotypes of the parent and  
146 evolved strains in the presence and absence of sodium using a tethered cell assay  
147 with particular focus on the upmotile G20V variant, L3.3 (Fig. 3, Supplementary Fig.  
148 10). The *potB* G20V fixed variant was clearly distinguishable from Pots in this assay  
149 and maintained rotation in both the absence of sodium and in the presence of  
150 phenamil, an amiloride derivative and sodium-channel blocker (Fig. 3A) (22). We  
151 confirmed the *potB* G20V H<sup>+</sup>-powered phenotype by introducing the same point  
152 mutation (GGG to GTG) on our plasmid vector (pPots) and testing motility in tethered  
153 cell assay when the protein was expressed in the statorless  $\Delta$ *motAB* RP6894 (Fig.

154 3B). Measurement of tethered rotational speed vs lithium and vs sodium showed  
155 that the *potB* G20V variant was motile at 0 mM Na<sup>+</sup> and 0 mM Li<sup>+</sup>, with a  
156 dependence on the concentration of ion, in contrast to *motA/motB*, whose rotational  
157 speed was independent of sodium or lithium concentration (Supplementary Fig. 11A-  
158 C). All stator types had cessation of rotation at 50 μM CCCP and showed no  
159 measurable effect as pH was varied between 6.0 and 8.0 (Supplementary Fig.  
160 11DE).

161 We further tracked single cell rotation in the tethered cell assay with sequential  
162 exchange of buffers, including characterization of *pomA* P177Q and *pomA* L183F  
163 (Supplementary Fig. 12). There, *potB* G20V (L3.3) actively rotated in K<sup>+</sup>MB<sub>EDTA</sub> and  
164 in Na<sup>+</sup>MB + 100 μM phenamil. K<sup>+</sup>MB cont indicating sodium-independent rotation.  
165 We further synthesized all possible variants at site G20 (23), and, of these, only  
166 G20V was able to rotate in the absence of sodium (Supplementary Fig. 13).

167 *Natural prevalence of motB G20 and motB V20.*

168 We examined the natural prevalence of glycine and valine at site 20 across a  
169 phylogeny from a collection of 82 *motB* sequences. Of these sequences, G20 was  
170 present only in the clade corresponding to *Vibrio sp. pomB* (7 sequences), whereas  
171 V20 was distributed across the phylogeny more broadly (41 sequences) (Fig.1D,  
172 Supplementary Fig. 14). Ancestral reconstruction across all nodes predicted that the  
173 ancestral phenotype of this phylogeny was V20.

174 *Reproducibility of stator mutagenesis and capacity for reversion.*

175 To examine mutation reproducibility in the stators, we subjected 55 Pots colonies to  
176 directed evolution in K<sup>+</sup>LB swim plates. These yielded a total of 42 flares within the  
177 first 3 days of incubation, which were then passaged four more times at 3-day  
178 intervals. At the end of this experiment we selected the 20 terminal lineage members  
179 which produced the largest swim rings and Sanger-sequenced them at the  
180 *pomA/potB* locus. For these we observed a total of 5 mutations in *pomA* (S25C,  
181 D31N, P177A, P177Q and L183F) and one more new mutation in *potB* (L36Q) (Fig.  
182 3C). We mapped monomer models for PomA and PotB generated using Alphafold  
183 (24) to a model PomA<sub>5</sub>PotB<sub>2</sub> complex using the published high-resolution *B. subtilis*  
184 MotA<sub>5</sub>B<sub>2</sub> structure (10) (Fig. 2C & 2D). All stator mutations accumulated at sites  
185 proximal to or within the predicted ion-transport pore, at the interface between the

186 PotB transmembrane domain and the third and fourth transmembrane domains of  
187 PomA (Fig. 2D).

188 Over the course of these experiments, we found that three stator residues underwent  
189 mutation at the same site twice (PomA L183F (2x), PomA P177A & P177Q, PotB  
190 G20V & G20W). WGS revealed that the *pitA* gene had mutated in three separate  
191 lineages (L2.5, L3.5, L8.5) with one of the mutations occurring twice (*pitA*  
192 W112\*Stop).

193 To test for the capacity for reversion, we took sequenced lineages that swam in K<sup>+</sup>LB  
194 swim plates (L3.3-4-5, L6.4-5, L8.3-4-5) and reintroduced them to an environment  
195 with high sodium (Na<sup>+</sup>LB swim plates) (Supplementary Fig. 15A). After 10 rounds of  
196 daily passaging, no reversion in the mutants that had enabled low-sodium swimming  
197 was observed, with only a single additional mutation gained: a *potB* T21A mutation in  
198 the terminal descendant of *potB* G20W *pitA* W112\*stop (L8.5).

#### 199 *Directed evolution from later starting points.*

200 We tested whether evolution could be more easily directed on minimal media when  
201 starting from a more favorable vantage point. We examined all stator mutants that  
202 swam on K<sup>+</sup>LB swim plates in conditions of further sodium scarcity (K<sup>+</sup>MM:  
203 ~1 mM [Na<sup>+</sup>]) (Supplementary Fig. 15B, Supplementary Table 3). Initially, only the  
204 strains with *potB* G20V and *pomA* P177Q mutations could swim, and this capacity  
205 was maintained following five passages over 12 days. Sanger sequencing revealed  
206 that the terminal descendant of *potB* G20V *pitA* G432R mutant (L3.5) gained a  
207 further mutation in *pomA* (M20L). A summary of all stator gene mutations obtained  
208 from all directed evolution experiments is provided in Fig. 3C. We also verified the  
209 capacity of strains at the pre-mutation stage to replicate the mutation of their lineage  
210 and found that L3.2 (pre-G20V) consistently replicated the *potB* G20V mutation over  
211 two independent experiments (6 out of 6 flares), and in one instance incorporated a  
212 *potB* L36Q mutation in addition to G20V (Supplementary Fig. 16).

#### 213 *Comparison of fitness and motility in competition.*

214 Finally, we compared fitness and competitive motility directly between the L3.3 (*potB*  
215 G20V) and the Pots ancestor. The *potB* G20V variant conferred a clear and  
216 discernible motility advantage in a mixed population on K<sup>+</sup>LB swim plates, while  
217 displaying similar growth in both Na<sup>+</sup> and K<sup>+</sup> LB liquid media (Supplementary Fig.  
218 17).



## 219 **DISCUSSION**

220 Mutation in DNA is a critical requirement for adaptation and evolution. Much is  
221 known about sources of spontaneous mutagenesis in bacteria, but the regulatory  
222 and molecular processes which control adaptation are not so well understood (25,  
223 26). Epistasis and functional redundancy in biochemical pathways impede the  
224 accurate forecasting of mutagenic events responsible for rescuing a phenotype  
225 which could be the result of loss-of-function mutations in negative regulator or gain-  
226 of-function in positive regulators (27). The flagellar system and its regulatory  
227 elements have been known to be under selective pressure due to their associated  
228 energetic and fitness costs, not always resulting in positive selection but also often  
229 resulting in gene deletion or inactivation by insertion sequences (28-33). By targeting  
230 the stator subunit of the flagellar motor, we have been able to study the molecular  
231 events leading to the spontaneous adaptation of a unique module within a highly  
232 conserved molecular complex (34).

233 Previous reports have shown that bacterial motility can adapt (8) and be rescued  
234 (35) via remodelling of the flagellar regulatory network. Ni et al. observed that  
235 evolutionary adaptation of motility occurs via remodeling of the checkpoint regulating  
236 flagellar gene expression (8). Their experiments tracked adaptive changes in swim  
237 plates, matching our experiments, but their only selection criteria were for improved  
238 swimming in an unhindered swimming population. In agreement with our results (*fliM*  
239 A161V), they found *fliM* (M67I and T192N) to be the amongst the first genes to  
240 mutate in the improved swimmer population but they did not report any changes in  
241 *flgL* ( $\Delta$ A57-Q58), nor, significantly, did they see any mutations in any stator genes.  
242 Flagellum-mediated motility also appears to be naturally robust to the loss of  
243 regulatory factors, such as the enhancer-binding protein fleQ in *P. fluorescens*,  
244 which function can be substituted by distantly related homologous proteins (35).

245 In contrast, our *E. coli* Pots strain faced selective pressure from ion scarcity. Our  
246 scenario is reminiscent of previous semi-solid agar experimental evolution studies on  
247 the adaptation of antibiotic resistance and produced similar results. In the MEGA  
248 plate experiments of Baym et al., they similarly saw that the phosphate transporter  
249 *pitA* was repeatedly mutated, often to a frameshifted or nonsense variant (21). In  
250 similar experiments the isocitrate dehydrogenase *icd* was also seen to mutate often  
251 (1, 36).



252 Differential expression analysis of our RNAseq datasets revealed that our two  
253 chosen lineages displayed different transcriptomic signatures during the adaptation  
254 of the stator genes. While the L183F lineage displayed many upregulated genes  
255 involved in motility, the G20V lineage was found to regulate genes involved in biofilm  
256 formation.

257 The improvement in low sodium motility observed in L5.3 (pre-L183F mutation stage)  
258 in comparison with its Pots ancestor may be explained by the upregulation of  
259 flagellar and chemotaxis genes in L5.3. Notably, L6.4 (pomA L183F) did not swim in  
260 the total absence of sodium (Supplementary Figure 12D), however the swim ring  
261 size of both L5.3 and L6.4 were greater relative to Pots on low sodium K<sup>+</sup>LB plates.  
262 The genes involved have also been measured as upregulated in a similar study on  
263 the adaptation of *E. coli* to swimming in soft agar (8) and it could be the case that  
264 upregulation of several flagellar components, including the chimeric sodium stators  
265 themselves (PomA and PotB), improves motility in these ~15 mM [Na<sup>+</sup>] plates. In  
266 contrast, the expression profile of the Na<sup>+</sup>-dependent swimmer L3.2 (pre-G20V  
267 mutation stage) was characterized by the regulation of genes involved in metabolic  
268 pathways indicative of nitrogen starvation, fermentation of products of catabolism  
269 such as amino acids and nucleotides and the transition to a biofilm lifestyle. Roughly  
270 10% of genes showed significant changes in transcription in both lineage trios  
271 (10.8% and 13.2% in L183F and G20V respectively) and all of these were  
272 upregulated during adaptation.

273 After the G20V mutation was fixed, L3.3 (G20V) was found to upregulate chemotaxis  
274 and motility genes, and other markers of adaptation to soft agar (*cheA*, *trp*, *tar*, *tap*)  
275 (8). Both lineages upregulated the *flhDC* regulator *LrhA* at the pre-mutation stage,  
276 hinting that downregulation of the flagellar biosynthetic cascade is a shared trait in  
277 the early stages of adaptation to a sodium-poor environment. Similarly, both lineages  
278 upregulated nucleotide catabolic processes and salvage pathways, a feature also  
279 observed in antibiotic response and which can affect mutation rates by disturbing the  
280 NTP balance in the cellular pool (37-39). This might suggest that the mutations were  
281 a product of stress-induced mutagenesis, a known facilitator of evolution (40) which  
282 has been proposed to involve *RpoS*-mediated upregulation of the *DinB* error-prone  
283 polymerase (41). In our RNAseq data, we saw minimal involvement of *RpoS*  
284 signalling (Supplementary Fig. 9) and no evidence of upregulation of known error-  
285 prone polymerases (Supplementary Table 2). This suggests that the molecular

286 events leading to fixation are not resolvable from transcriptomic analysis of only two  
287 lineages, or that alternate mechanisms could have facilitated mutagenesis. These  
288 may include mutagenesis via redox events on DNA, as seen in antibiotic resistance  
289 (42), or via transcription-dependent mechanisms (43, 44). The biological  
290 pathways leading to mutation remain to be elucidated.

291 We observed a convergence of mutations on the stator genes and even to the very  
292 same nucleotide (GAG (L) to GAA (F) in two separate *pomA* L183F lineages. Stator  
293 genes were the first to mutate in all of our WGS lineages under pressure from  
294 sodium scarcity. Given this was from a clonal population under identical  
295 environmental constraints, it suggests that adaptation of the stators provides a  
296 strong selective benefit in changing environments.

297 Mutations in stators are known to affect ion usage and may confer dual ion coupling  
298 capacity (12-14, 45). For example, the substate preference of the *B. alcalophilus*  
299 MotPS stator ( $\text{Na}^+/\text{K}^+$  and  $\text{Rb}^+$ ) was changed with the single mutation M33L in *motS*,  
300 causing the loss of both  $\text{K}^+$ - and  $\text{Rb}^+$ -coupling motility in *E. coli* (46). Similarly, a bi-  
301 functional *B. clausii* MotAB stator ( $\text{Na}^+/\text{H}^+$ ) triple mutant (*motB* V37L, A40S and  
302 G42S) was selective only for sodium ions while the combination of mutations G42S,  
303 Q43S and Q46A made MotB selective only for  $\text{H}^+$  (47). The previously reported  
304 S25C (48) and D31N (49) amino acid substitutions in PomA have been shown to  
305 reduce motility and, in the case of D31N, affect ion usage. Furthermore, single point  
306 mutations in stator genes of *Vibrio* spp. (eg. *pomB* G20V / G20R / P16S) have been  
307 shown to impart phenamil resistance both in *Vibrio alginolyticus* and in our Pots  
308 strain (50-52).

309 The PotB-G20V variant directly evolved here is capable of rotation in the absence of  
310 sodium, but its swimming speed does increase with increased availability of either  
311 sodium or lithium, with an energisation profile more akin to the parental Pots strain  
312 than the proton powered *E. coli* wild-type (Supplementary Fig. 11). This perhaps  
313 suggests that PotB-G20V is an opportunistic stator adaptation that enables  
314 promiscuity, allowing the passage of protons in sodium-scarce conditions.

315 The key difference in this work compared with previous efforts for directed evolution  
316 of the stators via mutagenesis (53), (54) is that here we edited the stators directly  
317 onto the *E. coli* genome to direct stator evolution *in vivo* in the native *E. coli* genomic  
318 context. This would not be possible in *Vibrio* sp. since *Vibrio* cells do not survive at

319 low sodium. Conversely, in our system it is difficult to use directed evolution to revert  
320 the ion-selectivity of the stator ( $H^+$  to  $Na^+$ ) because in *E. coli* it is not possible to  
321 drastically reduce the proton concentration without affecting essential systems.  
322 Nevertheless, the observation of no revertant agrees with previous work suggesting  
323 that requirements for  $Na^+$  binding are more strict than for  $H^+$  binding, and that  
324 mutations that convert a  $Na^+$  motor to an  $H^+$  are more accessible than the reverse  
325 (55, 56).

326 Mutation of pore-proximal residues into hydrophobic residues (eg. G20V) hinted at a  
327 mechanism for varying constrictions in the pore to alter the efficiency of ion binding.  
328 However, in contrast, none of the bulkier, hydrophobic amino acid replacements at  
329 *potB* G20 (eg. F,W) resulted in a similar G20V-like  $H^+$ -powered phenotype  
330 (Supplementary Fig. 13C). This suggests a selectivity mechanism enabled by G20V  
331 that is not driven simply by size. We propose an alternate mechanism whereby  
332 selectivity is maintained through perturbing the electrostatic environment in the  
333 vicinity of PotB D24 and the conserved P151 of PomA (*E. coli* MotA P173) (57).

334 Upon examination of the phylogenetic record with specific focus on the G20V locus,  
335 we observed that valine was more prevalent and distributed more broadly across  
336 microbial strains. This contemporary prevalence, and ancestral sequence  
337 reconstruction across our phylogeny implied that the ancestral state of MotB was  
338 more to be likely V20. While G20V point mutations arose spontaneously in our  
339 experiments within a few days, these transitions do not appear to have occurred in  
340 the evolutionary record. This may indicate constraints on the adaptation of the  
341 sodium-powered stator units when considered in their native sodium-dependent  
342 hosts.

343 Caution is required when applying learnings from directed evolution to natural  
344 evolution since selection pressures in the wild are not typically general (58). In this  
345 study we have leveraged our system, and our experimental design, to obtain large,  
346 measurable phenotypic change through a single mutation at the G20 locus. The  
347 stators of the flagellar motor appear ready to evolve in our experiments: they do not  
348 require transit through additional cryptic or neutral mutations, and thus are a model  
349 system for exploring molecular adaptation of ion selectivity. Alternative candidates  
350 such as sodium porters and pumps often have built in redundancy (59), and many  
351 marine microbes require sodium to be viable and thus evolutionary pressure cannot  
352 be applied with such specificity to a single protein complex. In our idealised system,

353 we are able to examine isogenic bacterial colonies without competitive effects, in a  
354 homogeneous medium without local niches. Nevertheless, it still remains difficult to  
355 quantify rates of adaptation (60). For these reasons, our system is optimised to  
356 produce stator variants, but it may be that this ease for adaptation via single-point  
357 mutation is accessible precisely because cryptic mutations have been accumulated  
358 due to exposure to changing environments in the distant past (61, 62).

359 Motility confers a fitness advantage that is worth significant energetic investment  
360 despite the high cost of synthesizing the flagellar machinery (4, 63)(33). This  
361 advantage can only be seized if the correct ions are available for stator-conversion  
362 into torque. We have shown here that the flagellar apparatus is capable of single-site  
363 mutation to adapt the stator genes to harness other available ions. While the  
364 modularity of the overall flagellar motor is now well shown (64) here we have  
365 observed further modularity and adaptability within the stator complex. Chimeric  
366 functional stators can not only be engineered from stator components in various  
367 species, they are also subsequently capable of rapid mutation to use ions more  
368 promiscuously. Motility provides many benefits to an organism but the exact  
369 evolutionary event which resulted in the first flagellar motor is not known (65).  
370 Nevertheless, our work shows that, following emergence, subsequent environmental  
371 adaptation can occur rapidly.

372

## 373 MATERIALS AND METHODS

### 374 *E. coli* strains, plasmids and culture media.

375 *E. coli* strain RP437 was used as the parent strain for genomic editing experiments  
376 (66), (67). The pSHU1234 (pPots) plasmid encoding *pomA* and *potB* (50) was used  
377 as the template to generate the double stranded donor DNA. This was used to  
378 replace the *motA* and *motB* gene on the RP437 chromosome. Point mutations in  
379 plasmids were generated using the QuikChange<sup>TM</sup> technique while saturation  
380 mutagenesis of the *potB* G20 site was performed using the '22-c trick' technique  
381 (23). Liquid cell culturing was done using LB broth (NaCl or KCl, 0.5% yeast extract,  
382 1% Bacto tryptone). Cells were cultured on agar plates composed of LB Broth and  
383 1% Bacto agar (BD, U.S.A.). Swim plate cultures were performed on the same  
384 substrates adjusted for agar content (0.3% Bacto Agar). Minimal Media (MM) was  
385 used to replace Yeast Extract and Tryptone in soft agar swim plates. MM

386 composition: 10 mM  $\text{KH}_2\text{PO}_4$  (KPi), 1 mM  $(\text{NH}_4)_2\text{SO}_4$ , 1 mM  $\text{MgSO}_4$ , 1  $\mu\text{g/ml}$   
387 Thiamine, 0.1 mM of each of the amino acids Thr, Leu, His, Met and Ser. Inhibition  
388 of  $\text{Na}^+$ -dependent motility was performed using phenamil methanesulfonate (P203  
389 Sigma-Aldrich) at 50  $\mu\text{M}$  and 100  $\mu\text{M}$  concentrations while  $\text{H}^+$ -dependent motility  
390 was inhibited using the protonophore Carbonyl cyanide 3-chlorophenylhydrazone  
391 (CCCP, C2759 Sigma-Aldrich).

### 392 **Editing *E. coli* with Cas9-assisted Recombineering.**

393 This procedure was adapted from the no-SCAR method (19). The target strain to be  
394 edited (*E. coli* RP437) was sequentially transformed first with the pKD-sgRNA-  
395 3'MotA ( $\text{Sm}^+$ ) plasmid, encoding a sgRNA sequence directed at the 3' end of *motA*,  
396 and then with the pCas9cr4 ( $\text{Cm}^+$ ) plasmid to yield a parent strain harboring both  
397 plasmids. The overlap extension PCR technique (68) was employed to assemble  
398 linear double stranded DNA molecules (dsDNA) using 3 starting dsDNA fragments.  
399 The resulting donor DNA was electroporated in the plasmid-bearing host and the  
400 successfully edited clones were selected via colony PCR and Sanger sequencing of  
401 the *motAB* locus. A list of primers and PCR protocols used in this work is provided in  
402 Supplementary Fig. 18.

### 403 **Construction of Pots by $\lambda$ -Red Recombineering**

404 Chromosomal replacement from *motA**motB* to *potA**potB* was achieved by using a  $\lambda$ -  
405 Red recombination system, with plasmid pKD46 encoding the Red system and  
406 positive selection for the recovery of swimming ability (69). Motile clones were  
407 selected by isolating motile flares on swim plates.

### 408 **Measurement of sodium concentration in solutions using Atomic Absorption** 409 **Spectroscopy (AAS)**

410 The amount of residual sodium in motility buffers and culture media was measured  
411 using Atomic Absorption Spectroscopy (ANA-182, Tokyo Photo Electric co., LTD,  
412 Japan). AAS measurements are displayed in Supplementary Table 3.

### 413 **Tethered cell assay preparation and analysis**

414 The tethered cell assay with anti-FliC-antibody (69, 70) was performed as previously  
415 described (22). Briefly, 1 mL of cells ( $\text{OD}_{600}=0.5$ ) grown in  $\text{K}^+\text{TB}$  buffer (Tryptone,  
416 85 mM KCl) was sheared by passing the cells suspension through a 26-gauge  
417 syringe needle 30 times. These cells were then washed 3 times in 1 mL motility  
418 buffer ( $\text{K}^+\text{MB}$ : 85 mM KCl, 10 mM KPi,  $\text{pH}=7.0$ ) and finally resuspended in 500  $\mu\text{L}$  of

419 motility buffer. Then, 20  $\mu$ L of suspension was loaded into a tunnel slide pre-filled  
420 with motility buffer that had previously been incubated with anti-FliC antibodies for 15  
421 min at room temperature (1:300 dilution in water). The unbound cells were then  
422 removed from the tunnel slide by washing with a total of 200  $\mu$ L of motility buffer  
423 (~10 times the tunnel slide volume). The tethered cells time lapse videos were  
424 recorded at 40x magnification on a phase contrast microscope (Nikon). Time lapse  
425 videos were collected using a camera (Chameleon3 CM3, Point Grey Research)  
426 recording 20s-long videos at 20 frames per second. Experiments involving single cell  
427 tracking during buffer exchange were recorded at 60 frames per second, with cells  
428 washed and resuspended in K<sup>+</sup>MB + 0.1 mM EDTA-2K (K<sup>+</sup>MB<sub>EDTA</sub>). Free-swimming  
429 cells were grown overnight in K<sup>+</sup>TB at 30°C to OD<sub>600</sub> ~0.5 then washed 3 times in 1  
430 mL K<sup>+</sup>MB before resuspension in 500  $\mu$ L of K<sup>+</sup>MB and imaging in a tunnel slide. A  
431 custom LabView software (17, 22, 50) was employed as previously reported to  
432 estimate specific rotational parameters of the tethered cells such as rotation  
433 frequency (speed), clockwise and counterclockwise bias, switching frequency and  
434 speed of swimming cells. FliC-sticky *E. coli* RP437 cells ( $\Delta$ *motAB*  $\Delta$ *cheY*  $\Delta$ *pilA* *fliC*<sup>st</sup>)  
435 (71) were used to collect data presented in Supplementary Fig. 11. Visualization of  
436 the data was performed using Graph Pad Prism 8.

#### 437 **Fitness comparison assay between Pots and L3.3 (*potB* G20V)**

438 Overnight cultures of the two strains grown in K<sup>+</sup>LB were adjusted to equal OD<sub>600</sub>  
439 then mixed at 1:1, 1:10 and 1:100 (L3.3 : Pots) ratios in a 100  $\mu$ l volume. 10  $\mu$ l of  
440 each mixture was then used to inoculate a 2 ml K<sup>+</sup>LB liquid culture at 30°C for 24hr.  
441 The resulting dense culture was then diluted to OD<sub>600</sub>=0.25 and then further diluted  
442 10<sup>6</sup>-fold in K<sup>+</sup>LB before streaking onto K<sup>+</sup>LB swim plates (20  $\mu$ l streaks) and  
443 incubating for 48hr at 30°C.

#### 444 **Single Nucleotide Polymorphism (SNP) analysis**

445 Whole genome sequencing of 22 *E. coli* strains was performed using a MiSeq 2 x  
446 150bp chip on an Illumina sequencing platform. Sequencing was carried out at the  
447 Ramaciotti Centre for Genomics, Kensington and delivered as demultiplexed fastQ  
448 files (Quality Control: >80% bases higher than Q30 at 2x150 bp). The SNP calling  
449 and analysis was performed using Snippy (72, 73). The short reads from sequencing  
450 were aligned to the MG1655 reference *E. coli* genome (GenBank: U00096.2) and to  
451 a synthetic genome based on MG1655, edited to contain the Pots stator sequences  
452 from pPots (*pomA/potB*) at the *motAB* locus.



## 453 **Transcriptomics**

454 RNA was extracted from bacterial cultures inoculated with glycerol stocks of the  
455 relevant strains and grown in K<sup>+</sup>LB broth at 30°C until OD<sub>600</sub>=0.5. Total RNA was  
456 extracted from a 0.5 ml aliquot of the culture using the RNAeasy Protect Bacteria  
457 Mini Kit (74524, QIAGEN) with on-column DNase digestion, as indicated in the  
458 manufacturer protocol. RNA quality was assessed using a TapeStation System  
459 (RNA ScreenTape, Agilent). All RNA samples selected for sequencing had an RNA  
460 Integrity Number (RIN) > 8. Library preparation and sequencing were performed at  
461 the Ramaciotti Centre using the NextSeq 500 platform (Illumina) running for 150  
462 cycle using a MID flowcell in paired-end read mode (2x75bp). Fastq files containing  
463 the RNAseq reads underwent quality control using FastQC (74) and then processed  
464 with FASTP (Version 0.20.1)(75), to remove low quality reads and trim adaptor  
465 sequences. Reads were aligned to the Pots reference genome using HISAT2(76),  
466 transcripts were assembled and quantified using STRINGTIE (73) and differential  
467 expression analysis was carried out using DESeq2 (77). Heatmaps dendrograms  
468 were generated using the Heatmap2 function from the R gplots package  
469 (Heatmap2). Complete clustering was performed using the Euclidean Distance  
470 method. All the analysis tools described above were run on the Galaxy webserver  
471 (<https://usegalaxy.org/>). Nucleotide variations that were present in motB and pomA  
472 were quantified from RNA-Seq data using the Rsamtools pileup function (78). This  
473 involved the writing of custom R scripts (available at <https://github.com/VCCRI>) that  
474 compared Rsamtools output to the genome reference.  
475 We then performed pathway analysis to identify which biological processes were  
476 relevant to the shared genes using the EcoCyc database (79).

## 477 **Structural Modelling**

478 The PomA<sub>5</sub>PotB<sub>2</sub> model was assembled by modelling each monomer using the  
479 Colabfold pipeline (24), and by aligning the resulting monomers to each subunit of  
480 the *B. subtilis* MotA<sub>5</sub>B<sub>2</sub> structure (PDB:6YSL) (10).

## 481 **Phylogenetics and Ancestral Reconstruction**

482 Phylogeny was generated with RAxML-HPC v.8 on XSEDE (80) through the  
483 CIPRES Science Gateway (81). The phylogeny was calculated using the  
484 PROTGAMMA protein substitution model, LG protein substitution matrix, and a  
485 parsimony seed value of 12345. Ancestral sequences were calculated using  
486 CodeML, a maximum likelihood program from the PAML package, using the LG rate  
487 file with the Empirical+F model and using 8 categories in dG of NSsites models (82).

488 Ancestral Sequence Reconstructions at each node were used to determine G20/V20  
489 identity at each node. Genomic context for the stators was pulled from the  
490 KEGG Database (83).

491

## 492 **AUTHOR CONTRIBUTIONS**

493 PR and MABB designed experiments and executed experiments in strain editing,  
494 molecular biology and microbiology. TI and YS executed experiments in strain  
495 editing. MABB executed bioinformatics surrounding variant calling. AL and MABB  
496 executed bioinformatics surrounding phylogenetics. PR, DTH, EG and MB executed  
497 bioinformatics surrounding the transcriptomics. MB supervised the design, execution  
498 and writing of the project. All authors contributed to writing and revision of the  
499 manuscript.

## 500 **ACKNOWLEDGEMENTS**

501 We would like to acknowledge Myu Yoshida and Rie Ito for technical assistance.

## 502 **COMPETING INTERESTS**

503 The authors declare that they have no competing interests.

## 504 **DATA AVAILABILITY**

505 All data needed to evaluate the conclusions in the paper are present in the paper  
506 and the Supplementary Materials. All WGS and RNAseq data is deposited as  
507 Bioproject Accession: PRJNA729860. Pots genome is deposited as GenBank:  
508 CP083410.1.

## 509 **FUNDING**

510 YS was supported by JSPS KAKENHI (JP18H02475 and JP20K06564), MEXT  
511 KAKENHI (JP19H05404, JP 21H00410 and JP21H05892) and Takeda Science  
512 Foundation. MABB was supported by a UNSW Scientia Research Fellowship, ARC  
513 Discovery Project DP190100497 and HFSP Young Investigator Project Grant  
514 RGY0072/20.

## 515 REFERENCES

- 516 1. D. T. Fraebel *et al.*, Environment determines evolutionary trajectory in a constrained  
517 phenotypic space. *Elife* **6**, (2017).
- 518 2. D. B. Roszak, R. R. Colwell, Survival strategies of bacteria in the natural environment.  
519 *Microbiol Rev* **51**, 365-379 (1987).
- 520 3. S. Gude *et al.*, Bacterial coexistence driven by motility and spatial competition. *Nature* **578**,  
521 588-592 (2020).
- 522 4. B. Ni, R. Colin, H. Link, R. G. Endres, V. Sourjik, Growth-rate dependent resource investment  
523 in bacterial motile behavior quantitatively follows potential benefit of chemotaxis. *Proc Natl*  
524 *Acad Sci U S A* **117**, 595-601 (2020).
- 525 5. M. J. Pallen, N. J. Matzke, From The Origin of Species to the origin of bacterial flagella. *Nat*  
526 *Rev Microbiol* **4**, 784-790 (2006).
- 527 6. Y. W. Lai, P. Ridone, G. Peralta, M. M. Tanaka, M. A. B. Baker, Evolution of the Stator  
528 Elements of Rotary Prokaryote Motors. *J Bacteriol* **202**, (2020).
- 529 7. L. D. Henderson *et al.*, Diversification of *Campylobacter jejuni* Flagellar C-Ring Composition  
530 Impacts Its Structure and Function in Motility, Flagellar Assembly, and Cellular Processes.  
531 *mBio* **11**, (2020).
- 532 8. B. Ni *et al.*, Evolutionary Remodeling of Bacterial Motility Checkpoint Control. *Cell Rep* **18**,  
533 866-877 (2017).
- 534 9. M. Santiveri *et al.*, Structure and function of stator units of the bacterial flagellar motor.  
535 2020.2005.2015.096610 (2020).
- 536 10. J. C. Deme *et al.*, Structures of the stator complex that drives rotation of the bacterial  
537 flagellum (vol 5, pg 1553, 2020). *Nature Microbiology* **5**, 1616-1616 (2020).
- 538 11. Y. Asai, T. Yakushi, I. Kawagishi, M. Homma, Ion-coupling determinants of Na<sup>+</sup>-driven and  
539 H<sup>+</sup>-driven flagellar motors. *J Mol Biol* **327**, 453-463 (2003).
- 540 12. Y. Sudo, H. Terashima, R. Abe-Yoshizumi, S. Kojima, M. Homma, Comparative study of the  
541 ion flux pathway in stator units of proton- and sodium-driven flagellar motors. *Biophysics*  
542 (*Nagoya-shi*) **5**, 45-52 (2009).
- 543 13. H. Terashima, S. Kojima, M. Homma, Functional transfer of an essential aspartate for the  
544 ion-binding site in the stator proteins of the bacterial flagellar motor. *J Mol Biol* **397**, 689-696  
545 (2010).
- 546 14. T. Terauchi, H. Terashima, S. Kojima, M. Homma, A conserved residue, PomB-F22, in the  
547 transmembrane segment of the flagellar stator complex, has a critical role in conducting ions  
548 and generating torque. *Microbiology (Reading)* **157**, 2422-2432 (2011).
- 549 15. N. Takekawa, K. Imada, M. Homma, Structure and Energy-Conversion Mechanism of the  
550 Bacterial Na<sup>(+)</sup>-Driven Flagellar Motor. *Trends Microbiol* **28**, 719-731 (2020).
- 551 16. N. Takekawa *et al.*, Structure of *Vibrio* FliL, a New Stomatin-like Protein That Assists the  
552 Bacterial Flagellar Motor Function. *mBio* **10**, (2019).
- 553 17. M. I. Islam, A. Lin, Y. W. Lai, N. J. Matzke, M. A. B. Baker, Ancestral Sequence Reconstructions  
554 of MotB Are Proton-Motile and Require MotA for Motility. *Front Microbiol* **11**, 625837  
555 (2020).
- 556 18. N. Takekawa *et al.*, Sodium-driven energy conversion for flagellar rotation of the earliest  
557 divergent hyperthermophilic bacterium. *Sci Rep* **5**, 12711 (2015).
- 558 19. C. R. Reisch, K. L. Prather, The no-SCAR (Scarless Cas9 Assisted Recombineering) system for  
559 genome editing in *Escherichia coli*. *Sci Rep* **5**, 15096 (2015).
- 560 20. K. A. Datsenko, B. L. Wanner, One-step inactivation of chromosomal genes in *Escherichia coli*  
561 K-12 using PCR products. *Proc Natl Acad Sci U S A* **97**, 6640-6645 (2000).
- 562 21. M. Baym *et al.*, Spatiotemporal microbial evolution on antibiotic landscapes. *Science* **353**,  
563 1147-1151 (2016).
- 564 22. M. I. Islam *et al.*, Novel Amiloride Derivatives That Inhibit Bacterial Motility across Multiple  
565 Strains and Stator Types. *Journal of Bacteriology* **203**, (2021).
- 566 23. S. Kille *et al.*, Reducing codon redundancy and screening effort of combinatorial protein  
567 libraries created by saturation mutagenesis. *ACS Synth Biol* **2**, 83-92 (2013).

- 568 24. M. Mirdita *et al.*, ColabFold - Making protein folding accessible to all.  
569 2021.2008.2015.456425 (2021).
- 570 25. J. W. Schroeder, P. Yeasin, L. A. Simmons, J. D. Wang, Sources of spontaneous mutagenesis  
571 in bacteria. *Crit Rev Biochem Mol Biol* **53**, 29-48 (2018).
- 572 26. K. C. Smith, Spontaneous mutagenesis: experimental, genetic and other factors. *Mutat Res*  
573 **277**, 139-162 (1992).
- 574 27. P. A. Lind, E. Libby, J. Herzog, P. B. Rainey, Predicting mutational routes to new adaptive  
575 phenotypes. *Elife* **8**, (2019).
- 576 28. G. C. Langridge *et al.*, Simultaneous assay of every Salmonella Typhi gene using one million  
577 transposon mutants. *Genome Res* **19**, 2308-2316 (2009).
- 578 29. A. Tominaga, R. Lan, P. R. Reeves, Evolutionary changes of the flhDC flagellar master operon  
579 in Shigella strains. *J Bacteriol* **187**, 4295-4302 (2005).
- 580 30. V. VERNYK *et al.*, Exploring the fitness benefits of genome reduction in Escherichia coli by a  
581 selection-driven approach. *Sci Rep* **10**, 7345 (2020).
- 582 31. G. R. Plague *et al.*, Transposable Elements Mediate Adaptive Debilitation of Flagella in  
583 Experimental Escherichia coli Populations. *J Mol Evol* **84**, 279-284 (2017).
- 584 32. S. Koskiniemi, S. Sun, O. G. Berg, D. I. Andersson, Selection-driven gene loss in bacteria. *PLoS*  
585 *Genet* **8**, e1002787 (2012).
- 586 33. P. E. Schavemaker, M. Lynch, Flagellar energy costs across the tree of life. *Elife* **11**, (2022).
- 587 34. N. J. Matzke, A. Lin, M. Stone, M. A. B. Baker, Flagellar export apparatus and ATP synthetase:  
588 Homology evidenced by synteny predating the Last Universal Common Ancestor. *Bioessays*  
589 **43**, e2100004 (2021).
- 590 35. T. B. Taylor *et al.*, Evolution. Evolutionary resurrection of flagellar motility via rewiring of the  
591 nitrogen regulation system. *Science* **347**, 1014-1017 (2015).
- 592 36. A. Anand *et al.*, Pseudogene repair driven by selection pressure applied in experimental  
593 evolution. *Nat Microbiol* **4**, 386-389 (2019).
- 594 37. B. Pang *et al.*, Defects in purine nucleotide metabolism lead to substantial incorporation of  
595 xanthine and hypoxanthine into DNA and RNA. *Proc Natl Acad Sci U S A* **109**, 2319-2324  
596 (2012).
- 597 38. A. J. Lopatkin, J. H. Yang, Digital Insights Into Nucleotide Metabolism and Antibiotic  
598 Treatment Failure. *Front Digit Health* **3**, (2021).
- 599 39. P. L. Foster, H. Lee, E. Popodi, J. P. Townes, H. Tang, Determinants of spontaneous mutation  
600 in the bacterium Escherichia coli as revealed by whole-genome sequencing. *Proc Natl Acad*  
601 *Sci U S A* **112**, E5990-5999 (2015).
- 602 40. R. S. Galhardo, P. J. Hastings, S. M. Rosenberg, Mutation as a stress response and the  
603 regulation of evolvability. *Crit Rev Biochem Mol* **42**, 399-435 (2007).
- 604 41. C. Shee, J. L. Gibson, M. C. Darrow, C. Gonzalez, S. M. Rosenberg, Impact of a stress-inducible  
605 switch to mutagenic repair of DNA breaks on mutation in Escherichia coli. *Proc Natl Acad Sci*  
606 *U S A* **108**, 13659-13664 (2011).
- 607 42. M. A. Kohanski, M. A. DePristo, J. J. Collins, Sublethal antibiotic treatment leads to multidrug  
608 resistance via radical-induced mutagenesis. *Mol Cell* **37**, 311-320 (2010).
- 609 43. C. P. Selby, Mfd Protein and Transcription-Repair Coupling in Escherichia coli. *Photochem*  
610 *Photobiol* **93**, 280-295 (2017).
- 611 44. H. Merrikh, Y. Zhang, A. D. Grossman, J. D. Wang, Replication-transcription conflicts in  
612 bacteria. *Nat Rev Microbiol* **10**, 449-458 (2012).
- 613 45. Y. Onoue *et al.*, Essential ion binding residues for Na(+) flow in stator complex of the Vibrio  
614 flagellar motor. *Sci Rep* **9**, 11216 (2019).
- 615 46. N. Terahara, M. Sano, M. Ito, A Bacillus Flagellar Motor That Can Use Both Na+ and K+ as a  
616 Coupling Ion Is Converted by a Single Mutation to Use Only Na+. *Plos One* **7**, (2012).
- 617 47. N. Terahara, T. A. Krulwich, M. Ito, Mutations alter the sodium versus proton use of a  
618 Bacillus clausii flagellar motor and confer dual ion use on Bacillus subtilis motors. *P Natl*  
619 *Acad Sci USA* **105**, 14359-14364 (2008).

- 620 48. Y. Asai, T. Shoji, I. Kawagishi, M. Homma, Cysteine-scanning mutagenesis of the periplasmic  
621 loop regions of PomA, a putative channel component of the sodium-driven flagellar motor in  
622 *Vibrio alginolyticus*. *J Bacteriol* **182**, 1001-1007 (2000).
- 623 49. S. Kojima, T. Shoji, Y. Asai, I. Kawagishi, M. Homma, A slow-motility phenotype caused by  
624 substitutions at residue Asp31 in the PomA channel component of a sodium-driven flagellar  
625 motor. *J Bacteriol* **182**, 3314-3318 (2000).
- 626 50. T. Ishida *et al.*, Sodium-powered stators of the bacterial flagellar motor can generate torque  
627 in the presence of phenamil with mutations near the peptidoglycan-binding region. *Mol*  
628 *Microbiol* **111**, 1689-1699 (2019).
- 629 51. S. Jaques, Y. K. Kim, L. L. McCarter, Mutations conferring resistance to phenamil and  
630 amiloride, inhibitors of sodium-driven motility of *Vibrio parahaemolyticus*. *Proc Natl Acad Sci*  
631 *U S A* **96**, 5740-5745 (1999).
- 632 52. S. Kojima, Y. Asai, T. Atsumi, I. Kawagishi, M. Homma, Na<sup>+</sup>-driven flagellar motor resistant to  
633 phenamil, an amiloride analog, caused by mutations in putative channel components. *J Mol*  
634 *Biol* **285**, 1537-1547 (1999).
- 635 53. A. G. Garza, L. W. Harris-Haller, R. A. Stoebner, M. D. Manson, Motility protein interactions  
636 in the bacterial flagellar motor. *Proc Natl Acad Sci U S A* **92**, 1970-1974 (1995).
- 637 54. S. Kojima, M. Kuroda, I. Kawagishi, M. Homma, Random mutagenesis of the pomA gene  
638 encoding a putative channel component of the Na<sup>(+)</sup>-driven polar flagellar motor of *Vibrio*  
639 *alginolyticus*. *Microbiology (Reading)* **145 ( Pt 7)**, 1759-1767 (1999).
- 640 55. A. Y. Mulkidjanian, M. Y. Galperin, K. S. Makarova, Y. I. Wolf, E. V. Koonin, Evolutionary  
641 primacy of sodium bioenergetics. *Biol Direct* **3**, 13 (2008).
- 642 56. C. C. Hase, N. D. Fedorova, M. Y. Galperin, P. A. Dibrov, Sodium ion cycle in bacterial  
643 pathogens: evidence from cross-genome comparisons. *Microbiol Mol Biol Rev* **65**, 353-370,  
644 table of contents (2001).
- 645 57. K. K. Mandadapu, J. A. Nirody, R. M. Berry, G. Oster, Mechanics of torque generation in the  
646 bacterial flagellar motor. *Proc Natl Acad Sci U S A* **112**, E4381-4389 (2015).
- 647 58. J. D. Bloom, F. H. Arnold, In the light of directed evolution: pathways of adaptive protein  
648 evolution. *Proc Natl Acad Sci U S A* **106 Suppl 1**, 9995-10000 (2009).
- 649 59. J. Atia *et al.*, Reconstruction of Cell Surface Densities of Ion Pumps, Exchangers, and  
650 Channels from mRNA Expression, Conductance Kinetics, Whole-Cell Calcium, and Current-  
651 Clamp Voltage Recordings, with an Application to Human Uterine Smooth Muscle Cells. *PLoS*  
652 *Comput Biol* **12**, e1004828 (2016).
- 653 60. M. J. McDonald, Microbial Experimental Evolution - a proving ground for evolutionary theory  
654 and a tool for discovery. *EMBO Rep* **20**, e46992 (2019).
- 655 61. J. A. Draghi, J. B. Plotkin, Molecular evolution: Hidden diversity sparks adaptation. *Nature*  
656 **474**, 45-46 (2011).
- 657 62. E. J. Hayden, E. Ferrada, A. Wagner, Cryptic genetic variation promotes rapid evolutionary  
658 adaptation in an RNA enzyme. *Nature* **474**, 92-95 (2011).
- 659 63. R. Colin, V. Sourjik, Emergent properties of bacterial chemotaxis pathway. *Curr Opin*  
660 *Microbiol* **39**, 24-33 (2017).
- 661 64. M. Kaplan *et al.*, Novel transient cytoplasmic rings stabilize assembling bacterial flagellar  
662 motors. *EMBO J* **41**, e109523 (2022).
- 663 65. M. Miyata *et al.*, Tree of motility - A proposed history of motility systems in the tree of life.  
664 *Genes Cells* **25**, 6-21 (2020).
- 665 66. J. S. Parkinson, Complementation analysis and deletion mapping of *Escherichia coli* mutants  
666 defective in chemotaxis. *J Bacteriol* **135**, 45-53 (1978).
- 667 67. S. M. Block, D. F. Blair, H. C. Berg, Compliance of bacterial flagella measured with optical  
668 tweezers. *Nature* **338**, 514-518 (1989).
- 669 68. R. Higuchi, B. Krummel, R. K. Saiki, A general method of in vitro preparation and specific  
670 mutagenesis of DNA fragments: study of protein and DNA interactions. *Nucleic Acids Res* **16**,  
671 7351-7367 (1988).

- 672 69. Y. Kinoshita *et al.*, Distinct chemotactic behavior in the original Escherichia coli K-12  
673 depending on forward-and-backward swimming, not on run-tumble movements. *Sci Rep* **10**,  
674 15887 (2020).
- 675 70. M. Nishiyama, S. Kojima, Bacterial motility measured by a miniature chamber for high-  
676 pressure microscopy. *Int J Mol Sci* **13**, 9225-9239 (2012).
- 677 71. Y. Sowa *et al.*, Direct observation of steps in rotation of the bacterial flagellar motor. *Nature*  
678 **437**, 916-919 (2005).
- 679 72. S. J. Bush *et al.*, Genomic diversity affects the accuracy of bacterial single-nucleotide  
680 polymorphism-calling pipelines. *Gigascience* **9**, (2020).
- 681 73. M. Pertea *et al.*, StringTie enables improved reconstruction of a transcriptome from RNA-seq  
682 reads. *Nat Biotechnol* **33**, 290-295 (2015).
- 683 74. S. Andrews. (2010).
- 684 75. S. Chen, Y. Zhou, Y. Chen, J. Gu, fastp: an ultra-fast all-in-one FASTQ preprocessor.  
685 *Bioinformatics* **34**, i884-i890 (2018).
- 686 76. D. Kim, B. Langmead, S. L. Salzberg, HISAT: a fast spliced aligner with low memory  
687 requirements. *Nat Methods* **12**, 357-360 (2015).
- 688 77. M. I. Love, W. Huber, S. Anders, Moderated estimation of fold change and dispersion for  
689 RNA-seq data with DESeq2. *Genome Biol* **15**, 550 (2014).
- 690 78. P. H. Morgan M, Obenchain V, Hayden N, in <https://bioconductor.org/packages/Rsamtools>.  
691 (2021).
- 692 79. P. D. Karp *et al.*, The EcoCyc Database. *Nucleic Acids Res* **30**, 56-58 (2002).
- 693 80. A. Stamatakis, RAxML version 8: a tool for phylogenetic analysis and post-analysis of large  
694 phylogenies. *Bioinformatics (Oxford, England)* **30**, 1312-1313 (2014).
- 695 81. M. A. Miller, W. Pfeiffer, T. Schwartz, in *Proceedings of the 2011 TeraGrid Conference:*  
696 *extreme digital discovery*. (2011), pp. 1-8.
- 697 82. Z. Yang, PAML: a program package for phylogenetic analysis by maximum likelihood.  
698 *Computer applications in the biosciences* **13**, 555-556 (1997).
- 699 83. M. Kanehisa, S. Goto, KEGG: kyoto encyclopedia of genes and genomes. *Nucleic Acids Res* **28**,  
700 27-30 (2000).

701



702 **Figure 1. Directed Evolution of the Flagellar Motor**

703 A) Experimental overview. Sodium swimming strain is repeatedly passaged on  
704 either Na<sup>+</sup>LB (~100 mM [Na<sup>+</sup>]) or K<sup>+</sup>LB (~15 mM [Na<sup>+</sup>]) plates. Where flares are  
705 observed on potassium plates, indicating a potentially upmotile variant, these are  
706 propagated and sent for sequencing. B) Our edited *E. coli* strains Pots and Pots<sup>Δ</sup>,  
707 obtained from *E. coli* RP437 via no-SCAR and λ-Red recombineering respectively,  
708 were passaged on soft agar (colored background, yellow: Na<sup>+</sup>; blue: K<sup>+</sup>) over an 18-  
709 day period. The summary comprises a total of 8 lineages (L1-L8) selected for further  
710 investigation, each comprised of 5 members (ie. L1.3 indicates the first lineage and  
711 the third passage of a motile flare). The day of collection and re-inoculation is  
712 indicated above each lineage member. The ability of each lineage member to swim  
713 in the presence of high or low sodium is displayed by a yellow or blue ring,  
714 respectively, corresponding to swim size on a swim plate. Lack of motility after 24 hr  
715 of incubation on K<sup>+</sup> soft agar is represented by a blue dot which corresponds to  
716 colony growth only. Ring sizes were measured from the pair of 150 mm diameter  
717 swim plates presented in panel C. Colonies that were non-motile in K<sup>+</sup>LB swim  
718 plates were confirmed with further incubation (Supplementary Fig. 3C), and are  
719 indicated by blue dots at inoculation centre. Lineage labels are red to indicate  
720 whole genome sequencing (WGS) data availability and boxed to indicate RNAseq  
721 data availability. Ancestral Pots was also analysed by WGS and RNAseq for  
722 comparison. SNPs identified via variant calling relative to the Pots reference genome  
723 are annotated next to each respective lineage member. Highlighted genes other than  
724 *pomA* and *potB*: *pitA* (metal phosphate:H<sup>+</sup> symporter), *flgL* (flagellar hook-filament  
725 junction protein 2), *fliM* (flagellar motor switch protein), *cdsA* (cardiolipin-diglyceride  
726 synthase), *icd* (isocitrate dehydrogenase), *rrsG* (16S ribosomal RNA). Scale bar: 10  
727 mm. A full list of identified SNPs is provided in Supplementary Table 1. C)  
728 Recapitulation of the directed evolution experiment. Na<sup>+</sup> (left) and K<sup>+</sup>(right) soft agar  
729 plates inoculated with a 1 μL aliquot of glycerol stock of each strain indicated in (B  
730 (except RP437) and arranged in the same order as (B. Arrows and labels indicate  
731 the first member in each lineage to display a mutation in the stator genes PomA or  
732 PotB. Each plate was incubated for 24 hr at 30°C. D) Phylogeny of MotB across 82  
733 species with ancestral reconstruction at the G20 site. G20 is conserved in the *Vibrio*  
734 *spp.* clade. Full phylogeny is shown in Supplementary Fig. 14.

735 **Fig.2. Differential expression analysis of RNAseq data.** Differentially expressed  
736 genes (DEGs, adjusted p-value < 0.01) measured across selected members of the  
737 L183F lineage (A) or G20V lineage (B). The average read counts (n = 3) for each  
738 gene were normalized by z-score and displayed as clustered heatmaps, flanked by  
739 their respective dendrograms. DEG clusters are labelled by their representative  
740 biological process (PANTHER). Genes upregulated with respect to the Pots strain  
741 are labelled in red, downregulated ones in blue. The ring diagrams above each  
742 heatmap are taken from fig.1 and indicate the motility phenotype of each lineage  
743 member. C) Venn diagram indicating the number of DEGs in each dataset and the  
744 DEGs in common, shown in the heatmap on the right.

745 **Figure 3. Functional characterization of evolved stators.** A) Single cell speed  
746 measurements using the tethered cell assay measured in Hz (revolutions/s). Blue  
747 bar indicates speed in K<sup>+</sup> motility buffer (K<sup>+</sup>MB), red bar: Na<sup>+</sup> motility buffer (Na<sup>+</sup>MB);  
748 red patterned bar: Na<sup>+</sup>MB + 100 μM phenamil. Number of cells analysed per  
749 condition (from left to right): RP437: 27, 51, 25; Pots: n.a, 78, n.a; Pots L3.3 *potB*  
750 G20V 45, 36, 39 (n.a. indicates no visible rotating cell). Error bars indicate Standard  
751 Deviation (S.D.). B) Single cell speed measurements using the tethered cell assay  
752 in RP6894  $\Delta$ *motAB* strain co-expressing *pomA* and *potB* G20V from pPots plasmid.  
753 Blue bar indicates speed in K<sup>+</sup>MB, red bar: Na<sup>+</sup>MB; red patterned bar: Na<sup>+</sup>MB + 100  
754 μM phenamil. Number of cells analysed per condition (from left to right): ( $\Delta$ *motAB* +  
755 pPots: n.a., 32, n.a;  $\Delta$ *motAB* + pPots *potB* G20V: 40, 63, 48). Error bars indicate  
756 S.D. Single cell tracked data shown in Supplementary Fig. 12. C) Graphical  
757 summary of stator gene mutations detected across all directed evolution experiments  
758 and the growth conditions under which these mutations arose. LB indicates agar  
759 containing yeast extract and tryptone. MM indicates agar in minimal media.  
760 Mutations in a subsequent generation are underlined. D) View from the extracellular  
761 side of the transmembrane portion of PomA<sub>5</sub>PotB<sub>2</sub> stator complex (see Methods:  
762 Structural Modelling). One monomer of subunit A is coloured in blue and the TM  
763 domains of the B subunits are coloured in yellow. Mutant sites obtained in the  
764 directed evolution experiments are labelled in green, the catalytic aspartate residue  
765 essential for function is highlighted in red. The red circle indicates the predicted  
766 location of the ion transport pore (inward conduction). E) side view of the area  
767 highlighted by the dashed box in D. Residues P151 (PomA) and D24 (PotB) are also  
768 highlighted in magenta and red respectively. Primary mutation sites are indicated in  
769 black, while secondary mutation sites are underscored. The arrow at the interface  
770 between (A)TM3-4 and (B)TM indicates the predicted location of the ion transport  
771 pore. The inset highlights the change in the pore region due to the G20V substitution  
772 in PotB (green).

773



**A.**

Norm. read count

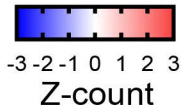

L5.3 L6.4  
(pre-L183F) (L183F)

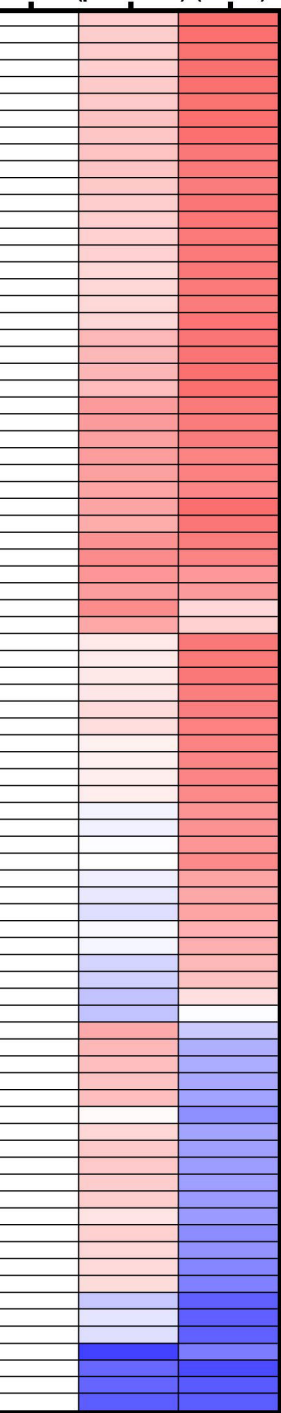

Chemotaxis  
Motility

AA metabolism (tyr/trp)  
Metal ion transport

AA transport  
AA mRNA processing

Purine metabolism

AA transport  
rRNA/mRNA  
processing

**B.**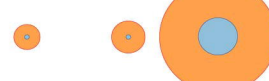

L3.2 L3.3  
(pre-G20V) (G20V)

Nucleotide Salvage  
Xanthine transport

AA transport and catabolism (tyr/trp)

TCA/Acetyl-CoA biosynthesis  
Adhesion

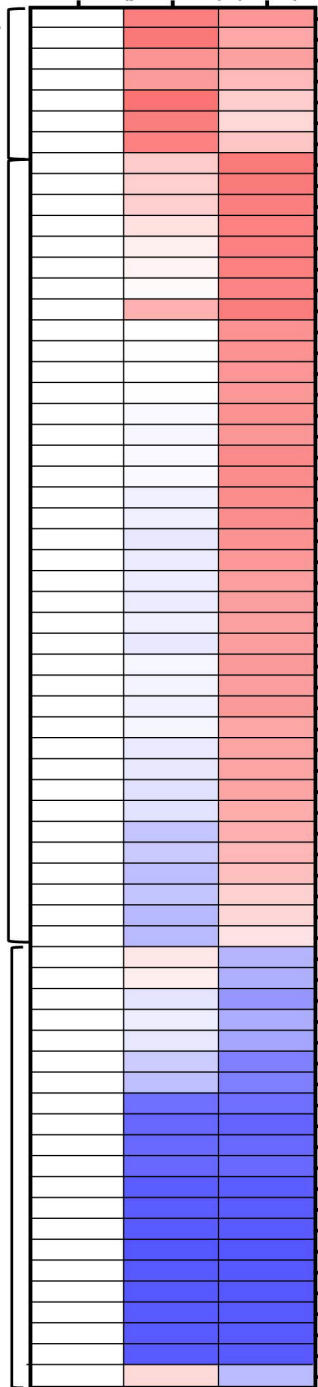**C.**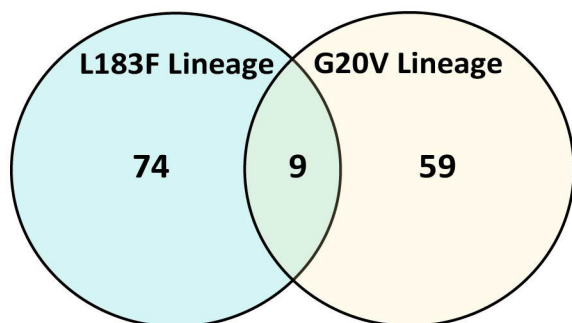

L4.2 L5.3 L3.2 L3.3  
(pre-L183F) (L183F) (pre-G20V) (G20V)

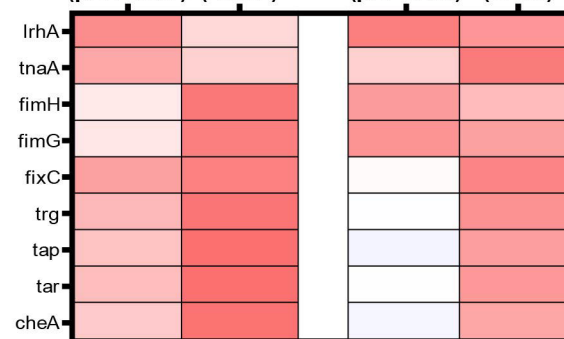

FlhDC inhibition  
AA catabolism

biofilm

motility



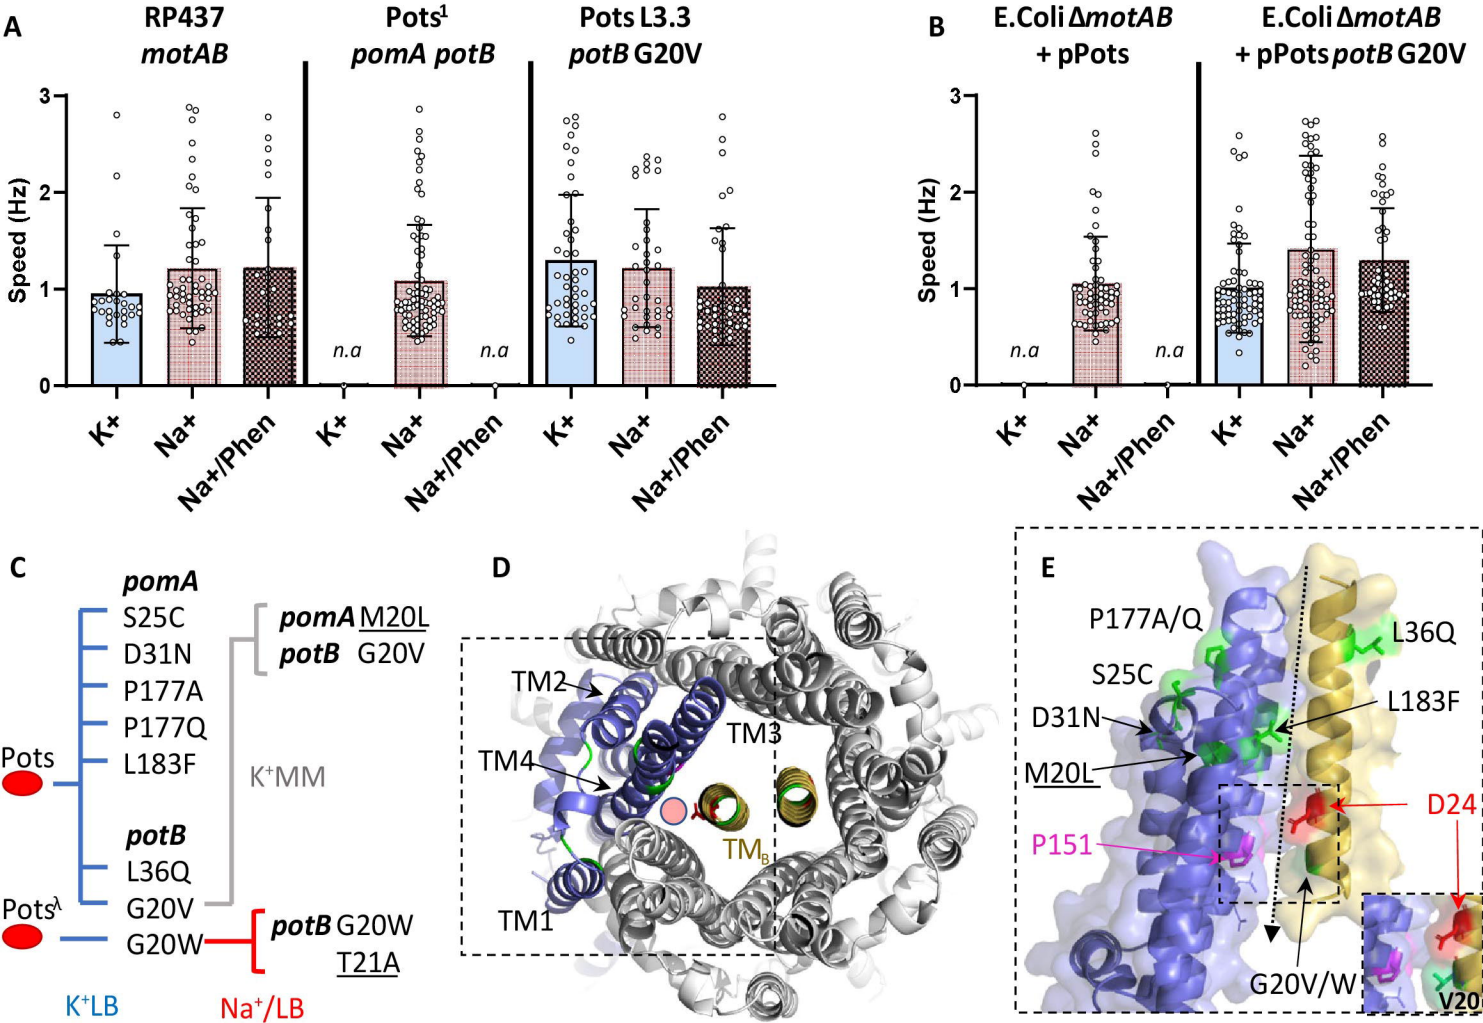

Source: https://www.biorxiv.org/content/10.1101/2021.01.26.427765v4.full.pdf
